1 *For: Journal of Experimental Biology*

2

3

4

5

6 **Nutritional physiology of life history trade-offs: how food protein-**  
7 **carbohydrate content influences life-history traits in the wing-**  
8 **polymorphic cricket *Gryllus firmus***

9 **Rebecca M. Clark<sup>a</sup>, Anthony J. Zera<sup>b</sup>, and Spencer T. Behmer<sup>a\*</sup>**

10

11 <sup>a</sup> Department of Entomology, Texas A&M University, College Station, TX 77843 USA

12 <sup>b</sup> School of Biological Sciences, University of Nebraska, Lincoln, NE 68588 USA

13

14 \* Author and address for correspondence: Spencer T. Behmer

15 Department of Entomology

16 Texas A&M University

17 College Station, TX 77843-2475, USA

18 Email: s-behmer@tamu.edu

19

20

21

22 **KEYWORDS:** feeding behavior, dispersal, reproductive physiology, nutrient allocation, sand

23 cricket

**24 Abstract**

25 Although life-history trade-offs result from the differential acquisition and allocation of  
26 nutritional resources to competing physiological functions, many aspects of this topic remain  
27 poorly understood. Wing-polymorphic insects, which possess alternate morphs that trade off  
28 allocation to flight capability versus early reproduction, provide a good model system for  
29 exploring this topic. In this study we used the wing-polymorphic cricket *Gryllus firmus* to test  
30 how expression of the flight capability vs. reproduction trade-off was modified across a  
31 heterogeneous protein-carbohydrate nutritional landscape. Newly molted adult female crickets  
32 were given one of 13 diets with different concentrations and ratios of protein and digestible  
33 carbohydrate; for each cricket we measured consumption patterns, growth, and allocation to  
34 reproduction (ovary mass) vs. flight muscle maintenance (flight muscle mass and somatic lipid  
35 stores). Feeding responses in both morphs were influenced more by total macronutrient  
36 concentration than protein-carbohydrate ratio, except at high macronutrient concentration, where  
37 protein-carbohydrate balance was important. Mass gain tended to be greatest on protein-biased  
38 diets for both morphs, but was consistently lower across all diets for long-winged females.  
39 When long-winged females were fed high-carbohydrate foods they accumulated greater somatic  
40 lipid stores; on high-protein foods they accumulated greater somatic protein stores. Food  
41 protein-carbohydrate content also affected short-winged females (selected for early reproductive  
42 onset), which showed dramatic increases in ovary size, including ovarian stores of lipids and  
43 protein, on protein-biased foods. This is the first study to show how the concentration and ratio  
44 of dietary protein and carbohydrate affects consumption and allocation to key physiological  
45 features associated with the reproduction-dispersal life-history trade-off.

## 46 **Introduction**

47 Since the 1980's, a major question in life history studies has been the extent to which trade-offs  
48 are influenced by nutrient input (van Noordwijk and de Jong, 1986; Zera et al., 1998; Boggs,  
49 1992, 2009; Zera and Harshman, 2001). Multiple studies have attempted to examine this issue,  
50 but the inferences drawn from these studies must be interpreted with caution because of three  
51 overlapping problems: (1) only a few diets were used, and these were often poorly defined with  
52 regard to specific nutrient content; (2) typically there was no attempt to quantify or control for  
53 changes in consumption between experimental diets, which is important given the ability of  
54 animals to practice compensatory feeding (Karasov and Martínez del Rio, 2007; Behmer, 2009)  
55 or (3) variation in calories was often confounded with variation in the amount of specific  
56 nutrients (discussed in Carvalho et al., 2005; Bass et al., 2007; Simpson and Raubenheimer,  
57 2007; Lee et al., 2008; Fanson et al., 2009; Grandison et al., 2009; Tatar, 2011; Piper et al.,  
58 2014). For example, in many past experiments diet treatments differed in caloric content and  
59 simultaneously in the amounts and ratios of specific macronutrients. Thus it was not possible to  
60 untangle the effects of these variables on life history traits, or to determine the effect of  
61 phenomena such as caloric restriction *per se* on life history traits. Because of such confounding  
62 effects, and underlying methodological problems, we still know relatively little about how  
63 nutrient inputs affect life-history trade-offs.

64  
65 Exploring how variation in food nutrient content is linked to the expression of life-history trade-  
66 offs requires two things: a demonstrated physiological trade-off that underlies a life history  
67 trade-off, and a detailed nutritional framework to investigate specific effects of nutrient variation.  
68 Wing-polymorphic insects exhibit a physiological trade-off that underlays a classic life history  
69 trade-off. Wing polymorphism involves discrete phenotypes that differ (trade-off) in flight  
70 capability and egg production. The physiological basis of the trade-off has been extensively  
71 studied (reviewed in Zera and Denno, 1997; Mole and Zera, 1993; Zera and Mole, 1994; Zera et  
72 al., 1994, 1997; Zhao and Zera, 2001; Zera and Larsen, 2001; Zera, 2005; Zera and Zhao, 2006;  
73 Zhao and Zera, 2006). In the wing-polymorphic sand cricket (*Gryllus firmus*), the mechanisms  
74 underlying this trade-off include shifts in juvenile hormone expression, lipid metabolism, and  
75 amino acid metabolism. Long-winged [LW(f)] adult female *G. firmus* maintain large flight  
76 muscles and triglyceride stores to fuel dispersal during early adulthood, but delay egg

77 production. By contrast, short-winged (SW) crickets, which never fully develop flight muscles  
78 or wings, and which accumulate lower lipid reserves, exhibit greater ovarian growth and begin  
79 laying eggs sooner. Both functions require specific nutritional inputs (including energetic and  
80 structural components), and therefore the expression of the trade-off between flight and  
81 reproduction is likely to depend on the nutritional context. However, physiological studies of  
82 this trade-off in *G. firmus* have almost exclusively been conducted on a single diet, and the  
83 influence of nutrient variability has largely been ignored.

84

85 All animals, including those that exhibit life-history trade-offs, require a broad suite of nutrients,  
86 so a detailed nutritional framework is vital to explicitly link life history trade-offs to specific  
87 nutrients, in the context of overall food nutrient content. The Geometric Framework (GF) does  
88 this, by investigating how animals simultaneously regulate and utilize multiple nutrients  
89 (Simpson and Raubenheimer, 2012). Mostly, though, the GF has focused on protein and  
90 digestible carbohydrates because they strongly impact animal growth and reproduction, and most  
91 animals actively, and tightly, regulate their intake (Behmer, 2009; Simpson and Raubenheimer,  
92 2012). While protein and carbohydrates have equal energetic value, they are utilized differently,  
93 with carbohydrates serving as an energy source and proteins providing amino acids that are  
94 assembled into structural tissues, enzymes, and proteins involved in almost every physiological  
95 process. Importantly, animals regulate intake in response to not only the total amount of protein  
96 and carbohydrate in food (nutrient concentration), but also with respect to the ratio of the two  
97 nutrients (Raubenheimer and Simpson, 1997; Simpson and Raubenheimer, 2012). The GF  
98 allows these important issues to be investigated, which have been largely ignored in  
99 physiological studies of life history trade-offs.

100

101 We recently applied the GF to crickets to understand interactions between nutrition and life-  
102 history trade-offs (Clark et al., 2013). Using five diets that differed in their protein-carbohydrate  
103 ratios, but had similar total macronutrient content (42%), we observed two key differences in the  
104 feeding strategies of the two adult female morphs. First, in a ‘choice’ assay, LW(f) crickets,  
105 compared to SW crickets, self-selected a diet that was more carbohydrate-biased. Second, in a  
106 ‘no-choice’ assay, LW(f) females decreased total consumption as the protein-carbohydrate ratio  
107 of the available food became increasingly imbalanced, whereas SW females consumed similar

108 total amounts of food regardless of food protein-carbohydrate ratio. This suggests that an  
109 important aspect of morph-specific adaptations for dispersal versus egg production is the  
110 differential acquisition of nutrients required for morph-specific functions, but we do not know  
111 yet how these intake strategies affect allocation. Testing the hypothesis that protein-  
112 carbohydrate content affects the trade-off between flight ability and reproduction necessitates a  
113 broader investigation of dietary quality, incorporating both differences in protein-to-carbohydrate  
114 ratios and concentrations. Crickets are opportunistic feeders (Capinera et al., 2004), so the  
115 nutritional content of their food can be highly variable. Animals, including insects, are known to  
116 employ compensatory mechanisms when eating foods that are nutritionally imbalanced (Simpson  
117 and Raubenheimer, 1993; Simpson et al., 2002; Cook et al., 2010) or have low nutrient  
118 concentration (Yang and Joern, 1994; Slansky and Wheeler, 1989; Lee et al., 2004).  
119 Furthermore, multiple studies have revealed that reproductive output and lifespan are also  
120 responsive to protein and carbohydrate concentrations and ratios (Maklakov et al., 2008; Lee et  
121 al., 2008, Roeder and Behmer, 2014).

122  
123 In the current study we first characterized body conditions of newly molted SW and LW(f) adult  
124 *G. firmus* female crickets. Specifically, we compared the morphs' initial body mass and  
125 allocation to somatic versus reproductive tissues. Next, we assessed the role of food protein-  
126 carbohydrate variation in the nature of the flight vs. reproduction life-history trade-off over the  
127 first five days of adulthood. To do so, we gave LW(f) and SW females one of thirteen diets with  
128 different concentrations and ratios of protein and carbohydrate for five days, and measured  
129 feeding patterns, mass gain, allocation to flight versus reproductive tissues, and lipid and protein  
130 profiles. We were particularly interested in determining the extent to which key morph  
131 differences in aspects of nutrient acquisition (e.g., patterns of consumption, dietary optima),  
132 documented in the pilot study of Clark et al. (2013), could be generalized across the more  
133 expansive nutritional environment of the present study. Finally, we sought to determine the  
134 extent to which the magnitude of the trade-off between nutrient allocation to components of  
135 flight (flight muscle mass and somatic lipid) versus reproduction (mass, lipid content, and  
136 protein content of ovaries) were canalized across the nutritional landscape. Alternatively, this  
137 would allow us to identify specific regions of nutritional space in which the dispersal-fecundity  
138 trade-off was either magnified or ameliorated. These results would not only identify how a life

139 history trade-off response to nutrient heterogeneity, but would also set the stage for an analysis  
140 of the biochemical mechanisms underlying this response.

141

## 142 **Results**

143 **Body conditions of newly molted adults.** The two morphs differed in initial dry mass (t-test:  
144  $t_{32}=6.92$ ,  $P<0.001$ ), with SW crickets being smaller than their LW(f) counterparts (Fig. 1A). The  
145 morphs also differed in their overall initial body composition (MANOVA:  $F_{4,29}=14.0$ ,  $P<0.001$ ;  
146 Fig. 1A), which consisted of dry mass measures of: (1) flight muscles, (2) ovaries, (3) somatic  
147 lipids (recovered from the carcass, excluding the flight muscles and ovaries), and (4) the  
148 remaining carcass (excluding flight muscle, ovaries and somatic lipids). Comparisons of  
149 individual body compartments (Fig. 1A) revealed that SW crickets possessed correspondingly  
150 lower flight muscle mass (t-test:  $t_{29}=5.01$ ,  $P<0.001$ ), lower absolute amounts of somatic lipids (t-  
151 test:  $t_{32}=6.16$ ,  $P<0.001$ ), and lower lipid-free somatic mass (t-test:  $t_{32}=4.35$ ,  $P<0.001$ ). Initial  
152 ovary mass was similar between the morphs (t-test:  $t_{32}=1.18$ ,  $P=0.250$ ), and represented a small  
153 fraction of the total dry mass in both morphs ( $4.3\pm 0.3\%$ ).

154

155 We also examined protein allocation to different non-reproductive (somatic) tissues. For these  
156 day zero crickets there were differences between the two morphs in the protein content of flight  
157 muscle and non-reproductive tissue (MANOVA:  $F_{2,32}=28.4$ ,  $P<0.001$ ; Fig. 1B). Most notably,  
158 LW(f) crickets had higher total amounts of protein in both flight muscle (t-test,  $t_{30}=5.7$ ,  $P<0.001$ )  
159 and somatic tissue (t-test,  $t_{32}=5.6$ ,  $P<0.001$ ). The higher absolute protein levels were associated  
160 with the initial size differences between the morphs. However, on a percentage basis, the SW  
161 crickets contained more somatic protein ( $57.7\pm 1.3\%$ ) than LW(f) crickets ( $50.2\pm 0.9\%$ ), and this  
162 difference was significant (t-test:  $t_{31}=4.9$ ,  $P<0.001$ ). There was no statistical difference between  
163 the two morphs (t-test,  $t_{24}=0.81$ ,  $P=0.43$ ) in the percentage of protein found in the flight muscle  
164 ( $70.3\pm 1.9\%$ ).

165

166 **Results from experimental manipulation of food protein-carbohydrate content.** Throughout  
167 the rest of the results we present findings from a five-day feeding experiment where crickets  
168 were given one of 13 diets containing different ratios and total amounts of protein and digestible  
169 carbohydrate (Table 1). Results from the five-day feeding trials were analyzed as linear models

170 of two-dimensional response surfaces, with cricket body mass as a covariate. To test for  
171 differences between the morphs, we used partial F-tests to select between reduced models  
172 containing only linear protein (p) and carbohydrate (c) terms plus their two-way combinations (p,  
173 c,  $p^2$ ,  $c^2$ ,  $p*c$ ) and models that contained these terms plus crossed combinations of all p and c  
174 terms with “morph.”

175  
176 ***Consumption results on the different diets.*** Over the five-day feeding trials, SW and LW(f)  
177 crickets had similar patterns of total food consumption across all 13 diets (partial F-test:  
178  $F_{6,157}=0.96$ ,  $P=0.46$ ), so statistical results (Table 2) and coefficients (in the text) from the reduced  
179 model only are reported. Separate figures are shown to facilitate understanding of the  
180 connection between food consumption and macronutrient intake (Fig. 2). In the reduced model,  
181 which omitted all “morph” terms, we found a significant quadratic carbohydrate term ( $c^2 = -$   
182  $112.57 \pm 44.59$ ), significant linear protein term ( $p = -52.44 \pm 21.99$ ), significant intercept ( $369.62$   
183  $\pm 87.21$ ), significant covariate (initial mass,  $0.49 \pm 0.13$ ); the protein-by-carbohydrate interaction  
184 term was non-significant. Collectively, this indicates strong effects of both carbohydrate and  
185 protein content on total food consumption (Table 2). Crickets ate the most on diets that had two  
186 features: (1) p:c ratios that were balanced or carbohydrate-biased [CB], and (2) low  
187 macronutrient concentration (e.g. diet p9.75:c21.75). Crickets also tended to consume more food  
188 when diets were low in protein.

189  
190 We also analyzed total macronutrient consumption (the combined intake of protein plus  
191 carbohydrate). Total macronutrient intake is presented and statistically analyzed in two ways:  
192 (1) as a response surface (Fig. 2B), and (2) as protein-carbohydrate intake arrays (Fig. 2C),  
193 which aids in visual analysis of intake patterns. Despite a general similarity in the shape of the  
194 response surfaces for each morph (Fig. 2B), patterns of total macronutrient consumption differed  
195 between the two morphs, as indicated by a significant morph-by-protein-by-carbohydrate  
196 interaction effect (partial F-test:  $F_{6,157}=2.27$ ,  $P=0.039$ ; Table 2, supplementary material, Tables  
197 S1 and S2). A significant negative quadratic carbohydrate term (supplementary Table S2) and  
198 the intake array (Fig. 2C) show that SW crickets achieved similar macronutrient intake on all but  
199 the three diets with the lowest nutrient content, which is indicated by the cluster of intake points  
200 lying roughly equidistant from the origin. LW(f) crickets, in contrast, tended to ingest

201 macronutrients in proportion to macronutrient concentration in each diet (significant linear  
202 protein and carbohydrate terms, supplementary Table S1). Inspection of the intake array for  
203 LW(f) crickets (Fig. 2C) shows that across the five isocaloric foods (42% macronutrient  
204 concentration), protein + carbohydrate intake was highest on the balanced diet compared to  
205 either protein-biased or carbohydrate-biased diets. This produced a curved line on the intake  
206 array for these diets (Figs. 2C), which repeats a pattern shown previously for LW(f) crickets  
207 (Clark et al., 2013). Overall, macronutrient intake was twice as high for high-concentration diets  
208 (>300 mg total p+c consumed), compared to low-concentration diets (160 mg total p+c  
209 consumed).

210

211 ***Physiological consequences of diets on mass gains, tissue gains, and nutrient stores.*** All  
212 experimental crickets were weighed at day zero (adult molt), and the SW experimental crickets  
213 were significantly smaller than the LW(f) crickets (t-test:  $t_{289}=6.49$ ,  $P<0.001$ ; SW=597±10 mg,  
214 LW(f)=667±9 mg live mass). At the end of the five-day feeding period, a significant morph  
215 effect, and a significant protein-by-carbohydrate interaction, were observed for mass gain (Table  
216 2, supplementary Tables S1 and S2). Averaged across all the treatments, SW crickets gained  
217 more mass than LW(f) crickets, and for both morphs the greatest gains occurred on high  
218 concentration, high-protein diets (e.g. p28:c14; Fig. 3A).

219

220 As the focus of this paper is on life-history trade-offs, we were particularly interested in how  
221 mass of the flight muscles and ovaries, after feeding for five days on the different diets, diverged  
222 between the morphs, and may have changed in a nutrient-dependent manner. In terms of flight  
223 muscle, we found a significant morph-by-protein interaction (Table 2, supplementary Tables S1  
224 and S2). For SW crickets, flight muscle mass was similar (on average 5.0±0.2 mg) across all the  
225 diets (Fig. 3B); however, compared to day zero SW crickets, flight muscle mass decreased by  
226 ~50% (Fig. 1A; model coefficients < 1, see supplementary Table S2). In contrast, flight muscle  
227 mass for LW(f) crickets increased on all treatments after five days of feeding as an adult, but  
228 increases were not constant across the different diets – instead, flight muscle mass increased as  
229 food protein concentration increased (Fig. 3B, supplementary Table S1).

230



231 Both cricket morphs had increased ovary mass by day five of adulthood (Fig. 1), but more  
232 importantly we found that ovary mass changed in a significant morph-by-protein-by-  
233 carbohydrate manner (Table 2). Two observations reveal the nature of this interaction. First, on  
234 equivalent diets, the ovary mass of SW crickets was always greater compared to LW(f) crickets  
235 (higher intercept estimate, supplementary Tables S1 and S2). Second, the range of ovary masses  
236 across the protein-carbohydrate nutritional landscape was much wider for SW crickets (21-86  
237 mg) compared to LW(f) crickets (14-38 mg). This was associated with larger coefficient  
238 estimates for the SW morph for protein and carbohydrate (significant linear protein and quadratic  
239 carbohydrate effects; supplementary Tables S1 and S2). Peak ovary size for both morphs  
240 occurred on diets that had high protein paired with moderate carbohydrate content (Fig. 3C),  
241 although peak ovary mass for SW crickets was ~2X (197%) greater than for LW(f) crickets.  
242 Furthermore, there was a smaller magnitude of difference in ovary mass between the morphs on  
243 diets with high-carbohydrate content (>28%), or at very low carbohydrate content (7%),  
244 compared to treatments with carbohydrate content between these two values.

245  
246 Next we analyzed lipid amounts in the soma (carcass minus flight muscle and ovaries) and  
247 ovaries, for both morphs, across the different diets (Table 3). Total lipids (for all tissues  
248 combined except flight muscle) were similar between morphs, but were dependent on diet  
249 carbohydrate content, as indicated by a significant linear carbohydrate effect ( $c = 20.4 \pm 3.6$ ), but  
250 not diet protein content; the intercept and initial cricket mass terms were significant (intercept = -  
251  $41.9 \pm 12.7$ ; initial mass =  $0.19 \pm 0.02$ ). However, when analyzed on a tissue-specific level,  
252 important morph and diet-dependent differences revealed how lipids were distributed across  
253 somatic versus reproductive tissues, and over the nutrient landscape (Table 3). First, we found  
254 significant linear morph and carbohydrate effects for somatic (carcass) lipid contents (Fig. 4A;  
255 supplementary Tables S1 and S2). LW(f) crickets had higher somatic lipid amounts than SW  
256 crickets across the full nutrient landscape, with peak values of  $117 \pm 7$  mg on the balanced,  
257 highest-macronutrient diet (p27:c36). In contrast, for the SW crickets, peak lipid amounts of  $79$   
258  $\pm 8$  mg occurred on the very carbohydrate-biased diet (p8:c34). Second, analysis of ovary lipids  
259 revealed a significant morph-by-protein effect (Table 3, supplementary Tables S1 and S2).  
260 Ovary lipid amounts were consistently higher in SW crickets across all of the diets, and peaked  
261 strongly on high-macronutrient, protein-biased diet p28.75:c23.75, reaching a total of  $13 \pm 3$  mg.

262 Ovary lipids were also maximal for LW(f) crickets on this diet, as well as diet p27:c36, but only  
263 reached a maximum of  $5 \pm 1$  mg, up from a minimum of just  $2 \pm 1$  mg on diet p9:c12. Viewed  
264 on a percentage basis, analysis of the proportion of the ovaries that was comprised of lipid  
265 indicated no difference between the morphs, but a significant quadratic protein effect, due to a  
266 low percentage of ovary lipids for diets in the center of the nutrient landscape (13.2% lipids)  
267 compared to the fringes (~15-19% lipids; see supplementary material Fig. S1, Table S3).

268  
269 Finally, we analyzed the protein content of the soma (carcass minus flight muscle and ovaries)  
270 and flight muscles. Total somatic protein content changed in a significant morph-by-protein-by-  
271 carbohydrate manner (Table 3, supplementary Tables S1 and S2). For LW(f) crickets, the  
272 highest somatic protein amounts (~157-158 mg) occurred in individuals on balanced, high-  
273 concentration diets (e.g., p27:c36 and p28.75:c23.75), whereas SW crickets had the highest  
274 somatic protein amounts (peaking at  $174 \pm 1$  mg) on a high-nutrient, very protein-biased diet  
275 (e.g., p28:c14; Fig. 5). Correspondingly, the quadratic protein and carbohydrate model terms  
276 were significant for the SW morph, whereas they were non-significant for the LW(f) morph  
277 (supplementary Tables S1 and S2). Flight muscle protein content also shifted in a significant  
278 morph-by-protein-by carbohydrate fashion, in correspondence with the changes in flight muscle  
279 size (Table 3, supplementary Tables S1 and S2). Flight muscle protein was unilaterally higher in  
280 the LW(f) morph across all the treatments. It peaked in LW(f) crickets at  $20 \pm 7$  mg on diet  
281 p27:c36, but even on diets with lower macronutrient content (e.g. p8:c34), flight muscle  
282 contained at least 13 mg of protein. Meanwhile, SW crickets had only between ~3-4 mg of  
283 protein in flight muscle across the nutrient landscape. When flight muscle protein was analyzed  
284 as a percentage of total flight muscle composition, the morph difference remained, in the form of  
285 a significant morph-by-carbohydrate effect (supplementary Table S3). The percentage of flight  
286 muscle consisting of protein occurred across a narrower range for LW(f) crickets (71-76%)  
287 compared to the SW morph (65-77%; supplementary Figure S1B). Protein percentages were  
288 lower on diets with a higher carbohydrate content (e.g. p8:c34).

289

## 290 **Discussion**

291 The expression and evolution of life-history trade-offs is hypothesized to be linked to the forms  
292 of nutrient limitation that an organism experiences (Boggs, 1992; Boggs and Ross, 1993; Zera

293 and Harshman, 2001; Fanson et al., 2012). Here, we have explicitly tested how the ratio and  
294 amounts of food protein and carbohydrate affect consumption and allocation patterns in  
295 association with a key life-history trade-off between dispersal and reproduction. In line with our  
296 predictions, *G. firmus* crickets showed morph-specific intake responses to food protein-  
297 carbohydrate content and balance, which in turn influenced mass gain and allocation to organs  
298 and the corresponding metabolites used for dispersal vs. reproduction. The differences in intake  
299 and in the nutrient requirements for dispersal vs. reproduction translated into separate optima for  
300 each morph, and in variation in the magnitude of the flight-dispersal trade-off across the nutrient  
301 landscape. Our results show, for the first time, how food protein and carbohydrate ratio and  
302 content are coupled to allocation on an organ-specific level, affecting the expression of this well-  
303 characterized life history trade-off.

304  
305 A food's nutrient content is a primary driver of animal feeding behavior, so the analysis of an  
306 animal's macronutrient intake patterns across a nutritional landscape is a critical step in  
307 understanding how nutrition influences subsequent aspects of performance (Waldbauer and  
308 Friedman, 1991; Chambers et al., 1995; Simpson et al., 2004; Behmer, 2009; Simpson and  
309 Raubenheimer, 2012). Without knowing what is consumed, and how much, it is difficult to  
310 elucidate how nutrients are allocated, and the nature of constraints affecting allocation. The  
311 finding that each morph adjusted macronutrient intake in different ways confirms earlier work  
312 that showed, over five isocaloric diets, that the morphs employ different "consumption rules"  
313 (Clark et al., 2013). Because the current study explored nutrient intake patterns over a broad  
314 protein-carbohydrate nutritional landscape, that included changes in both protein-to-carbohydrate  
315 ratio and total macronutrient concentration, the full nature of the morphs' consumption rules is  
316 now revealed. The intake response of the SW crickets – similar total macronutrient intake across  
317 all except the most nutrient-poor diets, even those with widely different p:c ratios – suggests SW  
318 crickets have an intrinsic upper limit or ceiling to total nutrient intake, as has been previously  
319 observed in generalist caterpillars (Simpson et al., 2004; Lee et al., 2004). The presence of a  
320 ceiling suggests there might be a cost for SW crickets overeating total amounts of protein and  
321 carbohydrate, perhaps due to limits on the morph's ability to increase its overall rate of nutrient  
322 processing above a threshold level. The LW(f) intake pattern, in contrast, indicates a lack of tight  
323 regulation in response to total diet macronutrient content, particularly on diets that were not

324 strongly imbalanced with respect to their protein-carbohydrate ratio. This suggests that LW(f)  
325 crickets will maximize food intake when they have access to foods that are nutrient-rich and  
326 have a relatively balanced protein-carbohydrate ratio. However, LW(f) crickets did show  
327 sensitivity to protein-carbohydrate balance across the five isocaloric diets, reinforcing our prior  
328 finding that LW(f) crickets employ a consumption strategy to minimize intake of whichever  
329 nutrient is in excess, while maximizing intake of the nutrient in surfeit (Clark et al., 2013).

330  
331 The contrasting effects of protein-carbohydrate ratio and concentration on macronutrient intake  
332 in the two morphs had direct implications for how the morphs allocated resources to tissues and  
333 metabolite pools under different nutritional contexts, particularly because proteins and  
334 carbohydrates are only partially interchangeable (Simpson et al., 2004). For instance, while  
335 gluconeogenesis provides a pathway for the generation of glucose from amino acids, this process  
336 is metabolically expensive and inefficient (van Milgen, 2002; Karasov and Martínez del Rio,  
337 2007), and normally only happens under extreme conditions (e.g. starvation). In contrast,  
338 carbohydrates can never substitute for amino acids required in the assembly of structural,  
339 storage, or enzymatic proteins. Indeed, changes in diet nutrient concentration and ratio had  
340 morph-specific effects on the end products of metabolic, and allocation trade-offs within each  
341 morph – e.g. on organ masses and nutrient stores in the soma, flight muscles, and ovaries (Zhao  
342 and Zera, 2006).

343  
344 Interestingly, the diet treatments that correspond to optima for each life-history strategy differed  
345 between morphs, and are distinct from, but related to, their previously identified self-selected  
346 nutrient targets (Clark et al., 2013). Optimal lipid acquisition in the LW(f) morph occurred on  
347 the balanced, concentrated diet p27:c36, which corresponds clearly and directly with their self-  
348 selected intake ratio (p1:c1.62; dashed line used to center the nutrient landscape, Clark et al.,  
349 2013). In contrast, for the SW morph, ovary masses were greatest on the very protein-biased diet  
350 p28:c14, which deviates from the SW self-selected ratio (p1:c1.30, Clark et al., 2013), which was  
351 protein-biased compared to the LW(f) morph but not nearly so extreme as the 2:1 ratio of diet  
352 p28:c14. The deviation for SW crickets suggests that factors other than reproductive demands  
353 may influence their nutrient intake during early adulthood. Lee et al. (2008) and Maklakov et al.  
354 (2008) also found distinct and different nutritional optima for the life-history traits of survival

355 and reproduction in *Drosophila* fruit flies and *Teleogryllus* field crickets. In both cases, self-  
356 selected protein-carbohydrate ratios occurred intermediate between the optima for survival and  
357 reproduction.

358  
359 Largely due to their strategy of “compensatory” feeding in response to changes in total nutrient  
360 concentration, the mass and ovary gains in SW females showed a strong, positive response to  
361 food protein content; the SW morph gained the most mass and developed the largest ovaries on  
362 the most protein-biased diet. This means that the mechanisms used by SW females to  
363 preferentially divert protein towards egg production are enhanced in settings where protein is  
364 abundantly available. SW somatic lipid content showed the opposite pattern, and was sensitive  
365 to food carbohydrate content, peaking on carbohydrate-biased foods with high nutrient  
366 concentrations. SW females do not utilize somatic lipid stores for flight in the same fashion as  
367 their LW(f) counterparts, meaning the SW morph may process and store excess carbohydrates as  
368 lipids either as a buffer against environmental variation in energy availability, or as an  
369 intermediate step before allocation to egg production.

370  
371 Consistent with findings from a prior series of simple diet dilution experiments (Zera and Brink,  
372 2000; Zera and Larsen, 2001), we found that LW(f) females preferentially retained flight muscle  
373 and somatic lipid stores at the expense of ovary development and overall mass gain, across the  
374 entire nutritional landscape. That is, the flight-fecundity trade-off is highly canalized. Since  
375 LW(f) crickets retained flight muscle and high lipid stores, once crickets are committed to the  
376 dispersal strategy, the maintenance of flight capability is inflexible and prioritized across  
377 nutritional environments. However, the means to this end may depend on the specific dietary  
378 context, especially given how LW(f) nutrient intake depended upon food protein-carbohydrate  
379 ratio and concentration. On a “standard” laboratory diet, increased lipid synthesis by the LW(f)  
380 morph was shown to result from the utilization of a greater proportion of fatty acid for glyceride  
381 biosynthesis over oxidation (Zera, 2005), as well as preferential metabolism of amino acids for  
382 use in fatty acid production and storage (Zera and Zhao, 2006; Zhao and Zera, 2006). In a  
383 simple diet dilution experiment, Zera and Larsen (2001) found that on a dilute (25%) diet, the  
384 LW(f) morph had lower triglyceride levels compared to early adulthood, but still managed to  
385 retain higher levels than the SW morph, most likely via decreased lipid utilization. Together,

386 these lead to increases in somatic triglyceride storage relative to SW crickets. All of these  
387 mechanisms are likely to have been involved in generating the higher somatic lipid levels  
388 observed here, and are currently under investigation. Indeed, we have found that triglyceride  
389 biosynthesis is strongly elevated in the LW(f) compared with the SW morph across the entire  
390 nutritional landscape (A.J. Zera, R. Clark, S. Behmer, unpublished data). In the present  
391 experiment, enhanced lipid biosynthesis most likely came at the cost of lower overall mass gain  
392 by LW(f) crickets across all diets, despite the general positive effect of food protein content on  
393 mass gain in both morphs. The diversion of nutrients to lipid synthesis might also be what  
394 allowed LW(f) crickets to consume greater total amounts of macronutrients when provided with  
395 more nutrient-dense foods, preventing the form of nutrient constraints observed in the SW  
396 morph.

397  
398 The differential morph responses across the nutritional landscape in terms of protein and  
399 carbohydrate intake, indicates that morph differences in protein and carbohydrate acquisition  
400 need to be explicitly taken into account in biochemical studies of internal resource allocation  
401 underlying the flight capability-fecundity trade-off. This will result in more refined  
402 nutritionally-explicit models of internal allocation with respect to protein and carbohydrate  
403 inputs and their effects on specific metabolic processes and life-history traits (Boggs, 2009;  
404 Fanson et al., 2012). To date, much of the efforts to explicitly link diet protein-carbohydrate  
405 (nutrient) content to allocation have focused on a putative nutrition-mediated trade-off between  
406 lifespan and reproduction, as detailed for *Drosophila*, Queensland fruit flies, and crickets (Lee et  
407 al., 2008; Maklakov et al., 2008; Skorupa et al., 2008; Fanson and Taylor, 2012; Piper et al.,  
408 2014). In these cases, optimal lifespan and maximal reproduction occur at different balances of  
409 protein-to-carbohydrate, indicating that animals are forced to compromise their intake strategy to  
410 reach a point between two different optima. It is critical to identify how specific nutrient  
411 allocation mechanisms generate such purported trade-offs, as in at least one case, what appeared  
412 superficially to be a lifespan-reproduction trade-off mediated by protein-carbohydrate balance  
413 can be more directly explained as a protein or amino acid dosage effect that can be decoupled  
414 from reproduction (Grandison et al., 2009; Fanson et al., 2012). Part of the remaining challenge  
415 for studies of allocation will therefore be to characterize the causal mechanisms connecting  
416 differential nutrient intake to differential allocation in the context of clearly defined life history

417 trade-offs, such as how diet protein-carbohydrate content is linked to hormonal shifts and  
418 changes in the flow of metabolites through specific pathways of intermediary metabolism  
419 (Harshman and Zera, 2007; Karasov and Martínez del Rio, 2007). This should effectively link a  
420 rich research tradition in nutritional biology to an equally rich body of work on organismal  
421 growth and production historically based on bioenergetics.

422

## 423 **Methods**

### 424 *Crickets - "Insects and Experimental Chambers"*

425 Female crickets came from large, outbred populations (greater than 200 breeders each  
426 generation) maintained at the University of Nebraska-Lincoln, that were artificially selected to  
427 produce either the flight-capable [LW(f)] or flightless (SW) morphs (see Zera and Larsen, 2001  
428 and Zera, 2005 for details). Nearly all (>95%) SW adults have vestigial flight muscles and are  
429 flightless. LW(f) individuals emerge with large flight muscles, which most (>85%) retain  
430 through day five of adulthood (Zera et al., 1997). Past day five, flight muscle histolysis, coupled  
431 with enhanced ovarian growth, occurs with increasing frequency in LW(f) individuals,  
432 converting them to the flightless [LW(h)] morph. All LW crickets used in the present  
433 experiment were dissected to confirm flight muscle status, and 28 LW(h) crickets were excluded  
434 from the sample sizes and analyses reported below because they represent a physiologically  
435 indistinct intermediate phenotype (Zera et al., 2007). We tested for the effects of the diet  
436 treatments on the probability that day five LW flight muscle histolysed by constructing a  
437 generalized linear model with a binomial link function, flight muscle condition as the dependent  
438 variable (pink and flight-capable or white and histolyzed), and linear protein and carbohydrate  
439 terms and the protein-by-carbohydrate interaction term as predictors. This model was tested by  
440 comparison against a null model (intercept only), using a likelihood ratio test with the chi-square  
441 statistic (Everitt and Hothorn, 2010). There were no differences in the incidence of LW(h)  
442 individuals across the diet treatments at day five ( $\chi^2=1.65$ ,  $df=3$ ,  $P=0.65$ ).

443

444 The present experiments compared one LW(f)-selected and one SW-selected population from  
445 one of three blocks (block 2) of a larger artificial selection experiment. Each block of the  
446 selection experiment represents an independent artificial selection trial involving one pair of  
447 LW(f) and SW selected populations. Previous studies have shown, without exception, that the

448 biochemical, endocrine, morphological and reproductive differences between LW(f) and SW  
449 selected populations of any block are similar to differences between selected populations of the  
450 other two blocks (Zera, 2005). Therefore, comparisons made between LW(f) and SW  
451 populations of any one block should be representative of general differences between LW(f) and  
452 SW selected populations.

453  
454 Juvenile crickets were shipped from the University of Nebraska-Lincoln to Texas A&M  
455 University, where they were raised to adulthood for experimental work. Groups of  
456 approximately 50 individuals were reared in 17-L transparent plastic boxes kept in an incubator  
457 with a 16h:8h light:dark cycle at a temperature of 28-29° C. Crickets were fed an *ad libitum*  
458 “standard” diet of wheat germ, wheat bran, whole milk powder, and nutritional yeast (Zera and  
459 Larsen, 2001), and were given water in two-oz plastic deli containers fitted with cotton wicks.  
460 Boxes were checked two to three times a day for newly molted adults, which were weighed and  
461 placed individually into small, plastic arenas (18.9 x 13.5 x 9.5 cm). In the arenas, crickets were  
462 provided with preweighed, spill-resistant dishes of dry synthetic foods, which varied in their  
463 protein-carbohydrate content (Raubenheimer and Simpson, 1990; see below). The plastic arenas  
464 also housed an aluminum perch and distilled drinking water in a one-ounce plastic container with  
465 a cotton wick.

466  
467 *Diets*

468 A total of 13 experimental diets that varied in their protein (p) and digestible carbohydrate (c)  
469 content were used (Table 1). These represented five p:c ratios, characterized relative to the  
470 crickets’ nutritional needs: (1) balanced [B], (2) carbohydrate-biased [CB], (3) protein-biased  
471 [PB], (4) very carbohydrate-biased [VCB], and (5) very protein-biased [VPB]. For each p:c ratio  
472 two or three total macronutrient levels (ranging from 21% to 63%) were studied. The first three  
473 diets listed in Table 1 had 21% total macronutrient content: (a) 4% protein and 17%  
474 carbohydrate [p4:c17; VCB], (b) p9:c12 [B], and (c) p14:c7 [VPB]. The next two diets had  
475 31.5% total macronutrient content: (d) p9.75:c21.75 [CB] and (e) p17.25:c14.25 [PB]. The third  
476 set contained 42% total macronutrient content: (f) p8:c34 [VCB], (g) p13:c29 [CB], (h) p18:c24  
477 [B], (i) p23:c19 [PB], and (j) p28:c14 [VPB]. Two diets contained 52.5% macronutrients: (k)  
478 p16.25:c36.25 [CB] and (l) p28.75:c23.75 [PB]. Finally, the thirteenth diet contained 63% total



479 macronutrient content: (m) p27:c36 [B]. The protein portion of the diet was a 3:1:1 mixture of  
480 casein, peptone and albumin; the digestible carbohydrate portion was a 1:1 mixture of sucrose  
481 and starch. Undigestible bulk cellulose was substituted for protein and carbohydrate to adjust  
482 total macronutrient contents, while other diet ingredients were kept consistent between diets (e.g.  
483 vitamins, cholesterol, and fatty acids). The synthetic diets used here were based on synthetic  
484 diets originally created and modified for grasshoppers (Dadd, 1961; Simpson and Abisgold,  
485 1985; Behmer et al., 2001); they were prepared as described in Behmer et al. (2003). Protein and  
486 digestible carbohydrates have approximately equivalent caloric value, so diets with similar total  
487 macronutrient content (despite having different ratios of protein-to-carbohydrate) are calorically  
488 equivalent.

489

#### 490 *Feeding Experiment*

491 To study the consequences of food intake under predefined nutritional conditions, newly  
492 emerged adult females were weighed and then allowed to feed *ad libitum* for five days on one of  
493 the 13 foods described above (sample sizes given in Table 1). Five days later, food dishes were  
494 removed and re-weighed, and crickets were weighed to determine their final wet mass. The  
495 crickets were frozen for dissection and measurement of flight muscles, ovaries, and body tissue  
496 composition. Ovaries and flight muscles (including both dorsoventral and dorsal-longitudinal  
497 muscles) were dissected from cricket carcasses and dried along with the carcasses at 70°C for at  
498 least three days, after which dry masses were measured. To estimate total somatic lipids,  
499 carcasses were homogenized with a mortar and pestle, and a subsample was weighed, placed into  
500 filter paper; soaked in three 24-hour changes of chloroform, dried for 24 hours, and re-weighed  
501 (Loveridge, 1973). Somatic nitrogen content was measured in a second carcass subsample and  
502 in intact, dried flight muscle via combustion analysis with an Elementar CN vario Max  
503 (Elementar, Germany). Nitrogen measurements were converted to protein by multiplying by  
504 6.25 (Robytt and White, 1990).

505

506 To assess changes in body condition and allocation from the beginning of adulthood, a second  
507 set of newly emerged day zero adult females was also collected as “reference crickets”; these  
508 individuals were weighed following emergence, and then immediately frozen for the same  
509 dissection and measurement procedures described above.

510  
511  
512  
513  
514  
515  
516  
517  
518  
519  
520  
521  
522  
523  
524  
525  
526

*Statistical Analysis*

All statistical analyses were performed in R (version 2.15.3), and values reported in the text are means  $\pm$  s.e.m. Diet effects were assessed via general linear models of response surfaces using the package ‘rsm’ to standardize the protein and carbohydrate treatment axes (Lenth, 2009). The cricket’s initial mass was used as a covariate to control for size differences. Response surface models included linear and quadratic terms for diet protein and carbohydrate content, as well as a protein-by-carbohydrate interaction term. To test for differences between cricket morphs, “morph” and “morph” interaction terms were added to a given model, and this model was compared against the original reduced model with a partial F-test. Where the two models were statistically significantly different, we interpreted this to indicate significant overall morph differences. Non-parametric response surface figures were generated with the thin-plate splines function (Tps) from the ‘fields’ package (Furrer et al., 2012), as these surfaces provide a more detailed visualization of the cricket data as compared to graphing the best-fitting response surface regression models.

527 **Acknowledgements**

528 We are grateful to M. Le Gall for help with diet preparation, to K. Alander and L. Sherer for help  
529 with cricket rearing, and to two anonymous reviewers for helpful comments on the manuscript.

530 **Funding**

531 This research was supported by the US National Science Foundation [grant number IOS-  
532 1121960 to S.T.B., grant number IOS-1122075 to A.J.Z.].

533 **Author Contributions**

534 S.T.B. and A.J.Z. developed the concepts and approach, R.M.C. performed experiments and data  
535 analysis, and S.T.B., A.J.Z. and R.M.C. prepared and edited the manuscript prior to submission.

536

537 **References**

- 538 **Bass, T.M., Grandison, R.C., Wong, R., Martinez, P., Partridge, L., and Piper, M.D.W.**  
 539 (2007). Optimization of dietary restriction protocols in *Drosophila*. *J. Gerontol. A-Biol.*  
 540 **62**(10), 1071-1081.
- 541 **Behmer, S.T.** (2009). Insect herbivore nutrient regulation. *Annu. Rev. Entomol.* **54**, 165-187.
- 542 **Behmer, S., Raubenheimer, D., and Simpson, S. J.** (2001). Frequency-dependent food  
 543 selection in locusts: a geometric analysis of the role of nutrient balancing. *Anim. Behav.*  
 544 **61**, 995–1005.
- 545 **Behmer, S., Cox, E., Raubenheimer, D., and Simpson, S. J.** (2003). Food distance and its  
 546 effect on nutrient balancing in a mobile insect herbivore. *Anim Behav.* **66**, 665–675.
- 547 **Boggs, C.** (1992). Resource allocation - Exploring connections between foraging and life history.  
 548 *Funct. Ecol.* **6**(5), 508–518.
- 549 **Boggs, C.L.** (2009). Understanding insect life histories and senescence through a resource  
 550 allocation lens. *Funct. Ecol.* **23**(1), 27-37.
- 551 **Boggs, C., and Ross, C.** (1993). The effect of adult food limitation on life history traits in  
 552 *Speyeria mormonia* (Lepidoptera: Nymphalidae). *Ecology*, **74**(2), 433–441.
- 553 **Capinera, J.L., Scott, R.D., and Walker, T.J.** (2004). *Field Guide to Grasshoppers, Katydid,*  
 554 *and Crickets of the United States*, 249 pp. Ithaca, NY: Cornell University Press.
- 555 **Carvalho, G.B., Kapahi, P., and Benzer, S.** (2005). Compensatory ingestion upon dietary  
 556 restriction in *Drosophila melanogaster*. *Nat. Methods* **2**(11), 813-815.
- 557 **Chambers, P.G., Simpson, S.G., and Raubenheimer, D.** (1995). Behavioural mechanisms of  
 558 nutrient balancing in *Locusta migratoria* nymphs. *Anim. Behav.* **50**, 1513-1523.
- 559 **Clark, R. M., McConnell, A., Zera, A. J., and Behmer, S. T.** (2013). Nutrient regulation  
 560 strategies differ between cricket morphs that trade-off dispersal and reproduction. *Funct.*  
 561 *Ecol.* **27**(5), 1126–1133.
- 562 **Cook, S.C., Eubanks, M.D., Gold, R.E., and Behmer, S.T.** (2010). Colony-level macronutrient  
 563 regulation in ants: Mechanisms, hoarding and associated costs. *Anim. Behav.* **79**(2), 429-  
 564 437.
- 565 **Dadd, R.** (1961). The nutritional requirements of locusts .4. Requirements for vitamins of the B-  
 566 complex. *J. Insect Physiol.* **6**(1), 1–12.
- 567 **Everitt, B.S., and Hothorn, T.** (2010). *A Handbook of Statistical Analyses Using R, Second*

- 568 *Edition*, pp. 117-138. Boca Raton, FL: CRC Press.
- 569 **Fanson, B.G., and Taylor, P.W.** (2012). Protein:carbohydrate ratios explain life span patterns  
570 found in Queensland fruit fly on diets varying in yeast:sugar ratios. *Age* **34**(6), 1361-  
571 1368.
- 572 **Fanson, B.G., Weldon, C.W., Perez-Staples, D., Simpson, S.J., and Taylor, P.W.** (2009).  
573 Nutrients, not caloric restriction, extend lifespan in Queensland fruit flies (*Bactrocera*  
574 *tryoni*). *Aging Cell* **8**(5), 514-523.
- 575 **Fanson, B.G., Fanson, K.V., and Taylor, P.W.** (2012). Cost of reproduction in the Queensland  
576 fruit fly: Y-model versus lethal protein hypothesis. *Proc. R. Soc. B* **279**, 4893-4900.
- 577 **Furrer, R., Nychka, D., and Sain, S.** (2012). fields: Tools for spatial data (Version 6.7).  
578 Retrieved from <http://CRAN.R-project.org/package=fields>
- 579 **Grandison, R.C., Piper, M.D.W., and Partridge, L.** (2009). Amino-acid imbalance explains  
580 extension of lifespan by dietary restriction in *Drosophila*. *Nature* **462**(7276), 1061-1064.
- 581 **Harshman, L.G., and Zera, A.J.** (2007). The cost of reproduction: The devil in the details.  
582 *Trends Ecol. Evol.* **22**(2), 80-86.
- 583 **Karasov, W.H., and Martínez del Rio, C.** (2007). *Physiological Ecology: How Animals*  
584 *Process Energy, Nutrients, and Toxins*, 471 pp. Princeton: Princeton University Press.
- 585 **Lee, K., Raubenheimer, D., and Simpson, S. J.** (2004). The effects of nutritional imbalance on  
586 compensatory feeding for cellulose-mediated dietary dilution in a generalist caterpillar.  
587 *Physiol. Entomol.* **29**(2), 108–117.
- 588 **Lee, K., Simpson, S. J., Clissold, F., Brooks, R., Ballard, J., Taylor, P., Soran, N., and**  
589 **Raubenheimer, D.** (2008). Lifespan and reproduction in *Drosophila*: New insights from  
590 nutritional geometry. *P. Natl. Acad. Sci. USA* **105**, 2498–2503.
- 591 **Lenth, R. V.** (2009). Response-Surface Methods in R, Using rsm. *J. Stat. Softw.* **32**(7), 1–17.
- 592 **Loveridge, J.** (1973). Age and the changes in water and fat content of adult laboratory-reared  
593 *Locusta migratoria migratorioides*. *Rhod. J. Agr. Res.* **11**, 131–143.
- 594 **Maklakov, A. A., Simpson, S. J., Zajitschek, F., Hall, M. D., Dessmann, J., Clissold, F.,**  
595 **Raubenheimer, D., Bonduriansky, R., and Brooks, R. C.** (2008). Sex-specific fitness  
596 effects of nutrient intake on reproduction and lifespan. *Curr. Biol.* **18**(14), 1062–1066.
- 597 **Mole, S., and Zera, A.** (1993). Differential allocation of resources underlies the dispersal-  
598 reproduction trade-off in the wing-dimorphic cricket, *Gryllus rubens*. *Oecologia*, **93**(1),

- 599 121–127.
- 600 **Piper, M.D.W., Blanc, E., Leitão-Gonçalves, R., Yang, M, He, X., Linford, N.J., Hoddinott,**  
601 **M.P., Hopfen, C., Soultoukis, G.A., Niemeyer, C., Kerr, F., Pletcher, S.D., Ribeiro,**  
602 **C., and Partridge, L.** (2014). A holidic medium for *Drosophila melanogaster*. *Nat.*  
603 *Methods* **11**(1), 100-108.
- 604 **Raubenheimer, D., and Simpson, S. J.** (1990). The effects of simultaneous variation in protein,  
605 digestible carbohydrate and tannic acid on the feeding behavior of larval *Locusta*  
606 *migratoria* and *Schistocerca gregaria* I: Short-term studies. *Physiol. Entomol.* **15**(2),  
607 219–233.
- 608 **Raubenheimer, D., and Simpson, S.J.** (1993). The geometry of compensatory feeding in the  
609 locust. *Anim. Behav.* **45**(5), 953-964.
- 610 **Raubenheimer, D., and Simpson, S.J.** (1997). Integrative models of nutrient balancing:  
611 Application to insects and vertebrates. *Nutr. Res. Rev.* **10**, 151-179.
- 612 **Robyt, J.F., and White, B.J.** (1990). *Biochemical Techniques: Theory and Practice*, 407 pp.  
613 Monterey, California: Brooks-Cole Publishing Company.
- 614 **Roeder, K.A., and Behmer, S.T.** (2014). Lifetime consequences of food protein-carbohydrate  
615 content for an insect herbivore. *Funct. Ecol.* **28**, 1135-1143.
- 616 **Simpson, S. J., and Abisgold, J.** (1985). Compensation by locusts for changes in dietary  
617 nutrients - behavioral mechanisms. *Physiol. Entomol.* **10**(4), 443–452.
- 618 **Simpson, S.J., and Raubenheimer, D.** (1993). A multi-level analysis of feeding behaviour: The  
619 geometry of nutritional decisions. *Phil. Trans. R. Soc. B* **342**, 381-402.
- 620 **Simpson, S.J., and Raubenheimer, D.** (2007). Caloric restriction and aging revisited: The need  
621 for a geometric analysis of the nutritional bases of aging. *J. Gerontol. A-Biol.* **62**(7), 707-  
622 713.
- 623 **Simpson, S.J., and Raubenheimer, D.** (2012). *The Nature of Nutrition: A Unifying Framework*  
624 *from Animal Adaptation to Human Obesity*. 239 pp. Princeton, N.J.: Princeton University  
625 Press.
- 626 **Simpson, S.J., Raubenheimer, D., Behmer, S.T., Whitworth, A., and Wright, G.A.** (2002). A  
627 comparison of nutritional regulation in solitary- and gregarious-phase nymphs of the  
628 desert locust *Schistocerca gregaria*. *J. Exp. Biol.* **205**, 121-129.
- 629 **Simpson, S.J., Sibly, R.M., Lee, K.P., Behmer, S.T., and Raubenheimer, D.** (2004). Optimal

- 630 foraging when regulating intake of multiple nutrients. *Anim. Behav.* **68**, 1299-1311.
- 631 **Skorupa, D.A., Dervisefendic, A., Zwiener, J., and Pletcher, S.D.** (2008). Dietary  
632 composition specifies consumption, obesity, and lifespan in *Drosophila melanogaster*.  
633 *Aging Cell* **7**, 478-490.
- 634 **Slansky, F., and Wheeler, G.** (1989). Compensatory increases in food consumption and  
635 utilization efficiencies by velvetbean caterpillars mitigate impact of diluted diets on  
636 growth. *Entomol. Exp. Appl.* **51**(2), 175–187.
- 637 **Tatar, M.** (2011). The plate half-full: Status of research on the mechanisms of dietary restriction  
638 in *Drosophila melanogaster*. *Exp. Gerontol.* **46**(5), 363-368.
- 639 **van Milgen, J.** (2002). Modeling biochemical aspects of energy metabolism in mammals. *J.*  
640 *Nutr.* **132**, 3195-3202.
- 641 **van Noordwijk, A.J., and de Jong, G.** (1986). Acquisition and allocation of resources: Their  
642 influence on variation in life history tactics. *Am. Nat.* **128**(1), 137-142.
- 643 **Waldbauer, G.P., and Friedman, S.** (1991). Self-selection of optimal diets by insects. *Annu.*  
644 *Rev. Entomol.* **36**, 43-63.
- 645 **Yang, Y., and Joern, A.** (1994). Compensatory feeding in response to variable food quality by  
646 *Melanoplus differentialis*. *Physiol. Entomol.* **19**(1), 75–82.
- 647 **Zera, A. J.** (2005). Intermediary metabolism and life history trade-offs: Lipid metabolism in  
648 lines of the wing-polymorphic cricket, *Gryllus firmus*, selected for flight capability vs.  
649 early age reproduction. *Integr. Comp. Biol.* **45**, 511–524.
- 650 **Zera, A. J., and Mole, S.** (1994). The physiological costs of flight capability in wing-dimorphic  
651 crickets. *Res. Popul. Ecol.* **36**(2), 151–156.
- 652 **Zera, A. J., and Denno, R. F.** (1997). Physiology and ecology of dispersal polymorphism in  
653 insects. *Annu. Rev. Entomol.* **42**(1), 207–230.
- 654 **Zera, A.J., and Brink, T.** (2000). Nutrient absorption and utilization by wing and flight muscle  
655 morphs of the cricket *Gryllus firmus*: Implications for the trade-off between flight  
656 capability and early reproduction. *J. Insect Physiol.* **46**(8), 1207-1218.
- 657 **Zera, A.J., and Harshman, L.G.** (2001). The physiology of life history trade-offs in animals.  
658 *Annu. Rev. Ecol. Syst.* **32**(1), 95-126.
- 659 **Zera, A., and Larsen, A.** (2001). The metabolic basis of life history variation: Genetic and  
660 phenotypic differences in lipid reserves among life history morphs of the wing-

- 661 polymorphic cricket, *Gryllus firmus*. *J. Insect Physiol.* **47**(10), 1147–1160.
- 662 **Zera, A. J., and Zhao, Z.** (2006). Intermediary metabolism and life-history trade-offs:  
663 Differential metabolism of amino acids underlies the dispersal-reproduction trade-off in a  
664 wing-polymorphic cricket. *Am. Nat.* **167**(6), 889–900.
- 665 **Zera, A., Mole, S., and Rokke, K.** (1994). Lipid, carbohydrate and nitrogen content of long-  
666 and short-winged *Gryllus firmus*: Implications for the physiological cost of flight  
667 capability. *J. Insect Physiol.* **40**, 1037–1044.
- 668 **Zera, A. J., Sall, J., and Grudzinski, K.** (1997). Flight-muscle polymorphism in the cricket  
669 *Gryllus firmus*: Muscle characteristics and their influence on the evolution of  
670 flightlessness. *Physiol. Zool.* **70**(5), 519–529.
- 671 **Zera, A.J., Potts, J., and Kobus, K.** (1998). The physiology of life-history trade-offs:  
672 Experimental analysis of a hormonally induced life-history trade-off in *Gryllus assimilis*.  
673 *Am. Nat.* **152**(1), 7-23.
- 674 **Zera, A.J., Zhao, Z., and Kaliseck, K.** (2007). Hormones in the field: Evolutionary  
675 endocrinology of juvenile hormone and ecdysteroids in field populations of the wing-  
676 dimorphic cricket *Gryllus firmus*. *Physiol. Biochem. Zool.* **80**(6), 592-606.
- 677 **Zhao, Z., and Zera, A.J.** (2001). Enzymological and radiotracer studies of lipid metabolism in  
678 the flight-capable and flightless morphs of the wing-polymorphic cricket, *Gryllus firmus*.  
679 *J. Insect Physiol.* **47**(11), 1337-1347.
- 680 **Zhao, Z., and Zera, A.J.** (2006). Biochemical basis of specialization for dispersal vs.  
681 reproduction in a wing-polymorphic cricket: Morph-specific metabolism of amino acids.  
682 *J. Insect Physiol.* **52**(6), 646-658.
- 683



684 **Figures and Tables**

685

686 **Fig. 1. Mean ( $\pm$  s.e.m.) cricket body allocation patterns, during early adulthood, for**  
 687 **flightless (SW) and flight-capable [LW(f)] female crickets.** Panels (A) and (B) show total  
 688 mean ( $\pm$  s.e.m.) cricket mass, and the mass of flight muscle, ovaries, lipid vs. non-lipid carcass  
 689 fractions, and flight muscle and somatic protein at day zero. Asterisks indicate significant  
 690 differences (MANOVA with post-hoc t-tests,  $P < 0.05$ ,  $N = 17$  SW and 16 LW(f) crickets). Panels  
 691 (C) and (D) show how, after five days, allocation patterns shift and differ between morphs (see  
 692 subsequent figures and text for details and statistics). Day five data are averages from across all  
 693 13 dietary treatments and are from 79 SW and 91 LW crickets.

694

695 **Fig. 2. Mean cricket consumption patterns across diets with different protein-**  
 696 **carbohydrate content (each nutrient expressed as a percentage of dry mass).** Flight-capable  
 697 (long-winged; LW(f);  $n = 91$ ) and flight-incapable (short-winged; SW;  $n = 79$ ) crickets were given  
 698 access to one of 13 diets (open circles) containing different amounts of protein and carbohydrate  
 699 for the first five days of adulthood. The total amount of food consumed (panel A) and  
 700 macronutrients ingested (panel B) are mapped as non-parametric thin-plate spline response  
 701 surfaces to allow detailed visualization of responses across the nutrient landscape. The dashed  
 702 line indicates the average self-selected ratio of protein to carbohydrate from a prior experiment  
 703 (Clark et al., 2013). Associated parametric statistics are given in Table 2. Macronutrient  
 704 ingestion is also presented as a bicoordinate plot of the mean ( $\pm$  s.e.m.) amounts of protein and  
 705 carbohydrate ingested for each diet (panel C). Dashed lines indicate food ratios, and the colored,  
 706 solid lines connect intake points across each of the five macronutrient concentrations offered.

707

708 **Fig 3. Mean cricket wet mass gains (A), flight muscle masses (B), and ovary masses (C), in**  
 709 **mg, as a function of diet protein and carbohydrate content.** For detailed information about  
 710 sample sizes and symbols, refer to the legend for Fig. 2. Associated parametric statistics are  
 711 given in Table 2.

712

713 **Fig 4. Mean cricket somatic lipid levels as a function of diet protein and carbohydrate**  
 714 **content.** Body lipid patterns (panel A) and ovary lipid patterns (panel B) are compared for flight-

715 incapable (short-winged; SW) and flight-capable [long-winged; LW(f)] adult crickets provided  
716 for five days with one of 13 diets containing different total amounts of protein and carbohydrate  
717 (open circles). For additional figure details, including sample sizes, refer to Fig. 2. Associated  
718 statistics are given in Table 3.

719

720 **Fig 5. Mean cricket somatic (A) and flight muscle (B) protein content as a function of**  
721 **dietary protein and carbohydrate content.** Protein levels are compared for flight-incapable  
722 (short-winged; SW) and flight-capable [long-winged; LW(f)] adult crickets provided for five  
723 days with one of 13 diets containing different total amounts of protein and carbohydrate (open  
724 circles). For additional figure details, including sample sizes, refer to Fig. 2. Statistics are given  
725 in Table 3.

726

727 **Table 1.** Dietary treatments expressed as protein:carbohydrate (p:c) ratios, with contents  
 728 expressed as a percentage of dry mass [e.g., p4:c17 = 4% protein and 17% carbohydrate, with  
 729 total macronutrient content = 21%]. The p:c ratio of each diet is also described relative to the  
 730 nutritional requirements of our crickets. Treatment sample sizes for flight-capable [LW(f)] and  
 731 flightless (SW) crickets on each treatment are also given.

| Diet protein:carbohydrate content |                          | Total                          |           |           |
|-----------------------------------|--------------------------|--------------------------------|-----------|-----------|
|                                   |                          | macronutrients<br>(% dry mass) | LW(f)     | SW        |
| (a) p4:c17                        | very carbohydrate-biased | 21                             | 9         | 6         |
| (b) p9:c12                        | balanced                 |                                | 7         | 6         |
| (c) p14:c7                        | very protein-biased      |                                | 6         | 6         |
| (d) p9.75:c21.75                  | carbohydrate-biased      | 31.5                           | 7         | 6         |
| (e) p17.25:c14.25                 | protein-biased           |                                | 8         | 6         |
| (f) p8:c34                        | very carbohydrate-biased | 42                             | 9         | 6         |
| (g) p13:c29                       | carbohydrate-biased      |                                | 5         | 6         |
| (h) p18:c24                       | balanced                 |                                | 5         | 6         |
| (i) p23:c19                       | protein-biased           |                                | 9         | 6         |
| (j) p28:c14                       | very protein-biased      |                                | 5         | 7         |
| (k) p16.25:c36.25                 | carbohydrate-biased      | 52.5                           | 5         | 6         |
| (l) p28.75:c23.75                 | protein-biased           |                                | 9         | 6         |
| (m) p27:c36                       | balanced                 | 63                             | 7         | 6         |
| <b>Total</b>                      |                          |                                | <b>91</b> | <b>79</b> |

732

733 **Table 2.** Statistical results for response surface models testing the effects of protein and  
 734 carbohydrate concentration, and morph type [SW vs. LW(f)], on Day 0-5 feeding, caloric intake,  
 735 mass gain, flight muscle mass, and ovary mass in crickets.

| Model terms                                                                          | Amount of food consumed                                   | Macro-nutrient intake                                      | Mass gain                                                  | Flight muscle mass                                         | Ovary mass                                                 |
|--------------------------------------------------------------------------------------|-----------------------------------------------------------|------------------------------------------------------------|------------------------------------------------------------|------------------------------------------------------------|------------------------------------------------------------|
| <b>Full model</b>                                                                    | <b>F<sub>6,163</sub>=5.9</b><br><b><i>P</i>&lt;0.001</b>  | <b>F<sub>12,157</sub>=16.0</b><br><b><i>P</i>&lt;0.001</b> | <b>F<sub>12,157</sub>=31.6</b><br><b><i>P</i>&lt;0.001</b> | <b>F<sub>12,156</sub>=161</b><br><b><i>P</i>&lt;0.001</b>  | <b>F<sub>12,156</sub>=12.9</b><br><b><i>P</i>&lt;0.001</b> |
| <b>Intercept</b>                                                                     | <b>F<sub>1,163</sub>=17.8</b><br><b><i>P</i>&lt;0.001</b> | <b>F<sub>1,157</sub>=18.8</b><br><b><i>P</i>&lt;0.001</b>  | <b>F<sub>1,157</sub>=43.6</b><br><b><i>P</i>&lt;0.001</b>  | <b>F<sub>1,156</sub>=34.1</b><br><b><i>P</i>&lt;0.001</b>  | <b>F<sub>1,156</sub>=18.3</b><br><b><i>P</i>&lt;0.001</b>  |
| <b>Initial cricket mass (covariate)</b>                                              | <b>F<sub>1,163</sub>=13.9</b><br><b><i>P</i>&lt;0.001</b> | <b>F<sub>1,157</sub>=9.29</b><br><b><i>P</i>=0.003</b>     | <b>F<sub>1,157</sub>=213.2</b><br><b><i>P</i>&lt;0.001</b> | <b>F<sub>1,156</sub>=111.2</b><br><b><i>P</i>&lt;0.001</b> | <i>F<sub>1,156</sub>=2.9</i><br><i><i>P</i>=0.09</i>       |
| <b>Morph</b>                                                                         |                                                           | <i>F<sub>1,157</sub>=0.24</i><br><i><i>P</i>=0.62</i>      | <b>F<sub>1,157</sub>=7.0</b><br><b><i>P</i>=0.009</b>      | <b>F<sub>1,156</sub>=327</b><br><b><i>P</i>&lt;0.001</b>   | <b>F<sub>1,156</sub>=18.5</b><br><b><i>P</i>&lt;0.001</b>  |
| <b>Protein</b>                                                                       | <b>F<sub>1,163</sub>=5.69</b><br><b><i>P</i>=0.02</b>     | <b>F<sub>1,157</sub>=19.4</b><br><b><i>P</i>&lt;0.001</b>  | <b>F<sub>1,157</sub>=22.9</b><br><b><i>P</i>&lt;0.001</b>  | <i>F<sub>1,156</sub>=0.21</i><br><i><i>P</i>=0.65</i>      | <b>F<sub>1,156</sub>=41.7</b><br><b><i>P</i>&lt;0.001</b>  |
| <b>Carbohydrate</b>                                                                  | <b>F<sub>1,163</sub>=5.48</b><br><b><i>P</i>=0.02</b>     | <b>F<sub>1,157</sub>=13.3</b><br><b><i>P</i>&lt;0.001</b>  | <i>F<sub>1,157</sub>=2.3</i><br><i><i>P</i>=0.13</i>       | <i>F<sub>1,156</sub>=0.33</i><br><i><i>P</i>=0.57</i>      | <b>F<sub>1,156</sub>=6.5</b><br><b><i>P</i>=0.01</b>       |
| <b>Protein<sup>2</sup></b>                                                           | <i>F<sub>1,163</sub>=0.16</i><br><i><i>P</i>=0.69</i>     | <i>F<sub>1,157</sub>=0.05</i><br><i><i>P</i>=0.83</i>      | <i>F<sub>1,157</sub>=0.03</i><br><i><i>P</i>=0.87</i>      | <i>F<sub>1,156</sub>=0.38</i><br><i><i>P</i>=0.54</i>      | <i>F<sub>1,156</sub>=0.37</i><br><i><i>P</i>=0.55</i>      |
| <b>Carbohydrate<sup>2</sup></b>                                                      | <b>F<sub>1,163</sub>=6.38</b><br><b><i>P</i>=0.01</b>     | <b>F<sub>1,157</sub>=5.7</b><br><b><i>P</i>=0.02</b>       | <b>F<sub>1,157</sub>=6.0</b><br><b><i>P</i>=0.02</b>       | <i>F<sub>1,156</sub>=0.27</i><br><i><i>P</i>=0.60</i>      | <b>F<sub>1,156</sub>=5.4</b><br><b><i>P</i>=0.02</b>       |
| <b>Protein*Carbohydrate</b>                                                          | <i>F<sub>1,163</sub>=0.02</i><br><i><i>P</i>=0.90</i>     | <b>F<sub>1,157</sub>=5.3</b><br><b><i>P</i>=0.02</b>       | <b>F<sub>1,157</sub>=4.6</b><br><b><i>P</i>=0.03</b>       | <i>F<sub>1,156</sub>=1.93</i><br><i><i>P</i>=0.17</i>      | <b>F<sub>1,156</sub>=5.7</b><br><b><i>P</i>=0.02</b>       |
| <b>Morph*Protein</b>                                                                 |                                                           | <i>F<sub>1,157</sub>=0.56</i><br><i><i>P</i>=0.46</i>      | <i>F<sub>1,157</sub>=0.17</i><br><i><i>P</i>=0.68</i>      | <b>F<sub>1,156</sub>=6.9</b><br><b><i>P</i>=0.01</b>       | <b>F<sub>1,156</sub>=8.4</b><br><b><i>P</i>=0.004</b>      |
| <b>Morph*Carbohydrate</b>                                                            |                                                           | <b>F<sub>1,157</sub>=6.6</b><br><b><i>P</i>=0.01</b>       | <i>F<sub>1,157</sub>=2.2</i><br><i><i>P</i>=0.14</i>       | <i>F<sub>1,156</sub>=0.019</i><br><i><i>P</i>=0.89</i>     | <i>F<sub>1,156</sub>=3.4</i><br><i><i>P</i>=0.07</i>       |
| <b>Morph*Protein<sup>2</sup></b>                                                     |                                                           | <i>F<sub>1,157</sub>=1.3</i><br><i><i>P</i>=0.26</i>       | <i>F<sub>1,157</sub>=0.31</i><br><i><i>P</i>=0.58</i>      | <i>F<sub>1,156</sub>=0.27</i><br><i><i>P</i>=0.61</i>      | <i>F<sub>1,156</sub>=0.40</i><br><i><i>P</i>=0.52</i>      |
| <b>Morph*Carbohydrate<sup>2</sup></b>                                                |                                                           | <i>F<sub>1,157</sub>=0.13</i><br><i><i>P</i>=0.72</i>      | <i>F<sub>1,157</sub>=1.04</i><br><i><i>P</i>=0.31</i>      | <i>F<sub>1,156</sub>=0.79</i><br><i><i>P</i>=0.37</i>      | <i>F<sub>1,156</sub>=0.72</i><br><i><i>P</i>=0.40</i>      |
| <b>Morph*Protein*Carbohydrate</b>                                                    |                                                           | <b>F<sub>1,157</sub>=5.4</b><br><b><i>P</i>=0.02</b>       | <i>F<sub>1,157</sub>=1.6</i><br><i><i>P</i>=0.21</i>       | <i>F<sub>1,156</sub>=1.24</i><br><i><i>P</i>=0.27</i>      | <b>F<sub>1,156</sub>=4.2</b><br><b><i>P</i>=0.04</b>       |
| <b>Model adjusted R<sup>2</sup></b>                                                  | 0.15                                                      | 0.52                                                       | 0.68                                                       | 0.92                                                       | 0.46                                                       |
| <b>Morph differences: Partial F-test between models with/without 6 “Morph” terms</b> | <i>F<sub>6,157</sub>=0.96</i><br><i><i>P</i>=0.46</i>     | <b>F<sub>6,157</sub>=2.27</b><br><b><i>P</i>=0.039</b>     | <b>F<sub>6,157</sub>=4.99</b><br><b><i>P</i>=0.001</b>     | <b>F<sub>6,156</sub>=191</b><br><b><i>P</i>&lt;0.001</b>   | <b>F<sub>6,156</sub>=14.4</b><br><b><i>P</i>&lt;0.001</b>  |

736 Initial cricket mass was included in models as a covariate, and protein and carbohydrate model  
 737 terms were standardized to a scale from -1 to 1. Model term significance was assessed with  
 738 partial F-tests. Bold indicates significance at the alpha=0.05 level and italicized terms are  
 739 marginally significant (alpha<0.10).

740 **Table 3.** Statistical results for response surface models testing the effects of protein and  
 741 carbohydrate concentration and morph type [LW(f) vs. SW] on day five body composition.

| Model terms                                                                                      | Somatic +<br>ovary lipids                           | Somatic<br>lipids                                     | Ovary lipids                                        | Somatic<br>protein                                  | Flight<br>muscle<br>protein                        |
|--------------------------------------------------------------------------------------------------|-----------------------------------------------------|-------------------------------------------------------|-----------------------------------------------------|-----------------------------------------------------|----------------------------------------------------|
| <b>Full model</b>                                                                                | <b>F<sub>6,141</sub>=23.4</b><br><b>P&lt;0.001</b>  | <b>F<sub>12,142</sub>=12.8</b><br><b>P&lt;0.001</b>   | <b>F<sub>12,146</sub>=8.47</b><br><b>P&lt;0.001</b> | <b>F<sub>12,151</sub>=34.7</b><br><b>P&lt;0.001</b> | <b>F<sub>12,155</sub>=168</b><br><b>P&lt;0.001</b> |
| <b>Intercept</b>                                                                                 | <b>F<sub>1,141</sub>=11.0</b><br><b>P=0.001</b>     | <b>F<sub>1,157</sub>=18.8</b><br><b>P&lt;0.001</b>    | <b>F<sub>1,157</sub>=43.6</b><br><b>P&lt;0.001</b>  | <b>F<sub>1,156</sub>=34.1</b><br><b>P&lt;0.001</b>  | <b>F<sub>1,156</sub>=18.3</b><br><b>P&lt;0.001</b> |
| <b>Initial cricket mass<br/>(covariate)</b>                                                      | <b>F<sub>1,141</sub>=103.2</b><br><b>P&lt;0.001</b> | <b>F<sub>1,157</sub>=9.29</b><br><b>P=0.003</b>       | <b>F<sub>1,157</sub>=213.2</b><br><b>P&lt;0.001</b> | <b>F<sub>1,156</sub>=111.2</b><br><b>P&lt;0.001</b> | <i>F<sub>1,156</sub>=2.9</i><br><i>P=0.09</i>      |
| <b>Morph</b>                                                                                     |                                                     | <b>F<sub>1,142</sub>=4.00</b><br><b>P=0.047</b>       | <b>F<sub>1,146</sub>=13.3</b><br><b>P&lt;0.001</b>  | <b>F<sub>1,151</sub>=6.46</b><br><b>P=0.01</b>      | <b>F<sub>1,155</sub>=351</b><br><b>P&lt;0.001</b>  |
| <b>Protein</b>                                                                                   | <i>F<sub>1,141</sub>=0.10</i><br><i>P=0.76</i>      | <i>F<sub>1,142</sub>=1.40</i><br><i>P=0.24</i>        | <b>F<sub>1,146</sub>=32.1</b><br><b>P&lt;0.001</b>  | <b>F<sub>1,151</sub>=72.3</b><br><b>P&lt;0.001</b>  | <i>F<sub>1,155</sub>=0.86</i><br><i>P=0.35</i>     |
| <b>Carbohydrate</b>                                                                              | <b>F<sub>1,141</sub>=32.5</b><br><b>P&lt;0.001</b>  | <b>F<sub>1,142</sub>=9.6</b><br><b>P=0.002</b>        | <i>F<sub>1,146</sub>=0.39</i><br><i>P=0.53</i>      | <b>F<sub>1,151</sub>=6.58</b><br><b>P=0.01</b>      | <i>F<sub>1,155</sub>=0.002</i><br><i>P=0.97</i>    |
| <b>Protein<sup>2</sup></b>                                                                       | <i>F<sub>1,141</sub>=0.024</i><br><i>P=0.88</i>     | <i>F<sub>1,142</sub>=0.22</i><br><i>P=0.64</i>        | <i>F<sub>1,146</sub>=0.08</i><br><i>P=0.77</i>      | <i>F<sub>1,151</sub>=0.90</i><br><i>P=0.34</i>      | <i>F<sub>1,155</sub>=0.77</i><br><i>P=0.38</i>     |
| <b>Carbohydrate<sup>2</sup></b>                                                                  | <i>F<sub>1,141</sub>=1.83</i><br><i>P=0.18</i>      | <i>F<sub>1,142</sub>=63</i><br><i>P=0.43</i>          | <i>F<sub>1,146</sub>=3.00</i><br><i>P=0.085</i>     | <b>F<sub>1,151</sub>=6.84</b><br><b>P=0.01</b>      | <i>F<sub>1,155</sub>=0.23</i><br><i>P=0.63</i>     |
| <b>Protein*Carbohydrate</b>                                                                      | <i>F<sub>1,141</sub>=0.004</i><br><i>P=0.95</i>     | <i>F<sub>1,142</sub>=0.31</i><br><i>P=0.58</i>        | <i>F<sub>1,146</sub>=1.28</i><br><i>P=0.26</i>      | <b>F<sub>1,151</sub>=6.15</b><br><b>P=0.01</b>      | <i>F<sub>1,155</sub>=1.29</i><br><i>P=0.26</i>     |
| <b>Morph*Protein</b>                                                                             |                                                     | <i>F<sub>1,142</sub>=1.6</i><br><i>P=0.22</i>         | <b>F<sub>1,146</sub>=8.64</b><br><b>P=0.004</b>     | <i>F<sub>1,151</sub>=2.31</i><br><i>P=0.13</i>      | <b>F<sub>1,155</sub>=8.54</b><br><b>P=0.004</b>    |
| <b>Morph*Carbohydrate</b>                                                                        |                                                     | <i>F<sub>1,142</sub>=0.95</i><br><i>P=0.33</i>        | <i>F<sub>1,146</sub>=0.51</i><br><i>P=0.48</i>      | <b>F<sub>1,151</sub>=10.8</b><br><b>P=0.001</b>     | <i>F<sub>1,155</sub>=0.087</i><br><i>P=0.77</i>    |
| <b>Morph*Protein<sup>2</sup></b>                                                                 |                                                     | <i>F<sub>1,142</sub>=0.05</i><br><i>P=0.82</i>        | <i>F<sub>1,146</sub>=0.56</i><br><i>P=0.46</i>      | <i>F<sub>1,151</sub>=0.009</i><br><i>P=0.93</i>     | <i>F<sub>1,155</sub>=0.14</i><br><i>P=0.71</i>     |
| <b>Morph*Carbohydrate<sup>2</sup></b>                                                            |                                                     | <i>F<sub>1,142</sub>&lt;0.001</i><br><i>P&gt;0.99</i> | <i>F<sub>1,146</sub>=0.57</i><br><i>P=0.45</i>      | <i>F<sub>1,151</sub>=1.08</i><br><i>P=0.30</i>      | <i>F<sub>1,155</sub>=1.56</i><br><i>P=0.21</i>     |
| <b>Morph*Protein*Carb-<br/>ohydrate</b>                                                          |                                                     | <i>F<sub>1,142</sub>=0.22</i><br><i>P=0.64</i>        | <i>F<sub>1,146</sub>=0.61</i><br><i>P=0.43</i>      | <b>F<sub>1,151</sub>=7.63</b><br><b>P=0.006</b>     | <b>F<sub>1,155</sub>=4.22</b><br><b>P=0.04</b>     |
| <b>Model adjusted R<sup>2</sup></b>                                                              | 0.48                                                | 0.48                                                  | 0.36                                                | 0.71                                                | 0.92                                               |
| <b>Morph differences:<br/>Partial F-test between<br/>models with/without 6<br/>“Morph” terms</b> | <i>F<sub>6,135</sub>=1.13</i><br><i>P=0.35</i>      | <b>F<sub>6,142</sub>=2.44</b><br><b>P=0.028</b>       | <b>F<sub>6,146</sub>=10.2</b><br><b>P&lt;0.001</b>  | <b>F<sub>6,151</sub>=7.0</b><br><b>P&lt;0.001</b>   | <b>F<sub>6,155</sub>=205</b><br><b>P&lt;0.001</b>  |

742 Initial cricket mass was included in models as a covariate, and protein and carbohydrate model  
 743 terms were standardized to a scale from -1 to 1. Model term significance was assessed with  
 744 partial F-tests. Bold indicates significance at the alpha=0.05 level and italicized terms are  
 745 marginally significant (alpha<0.10).

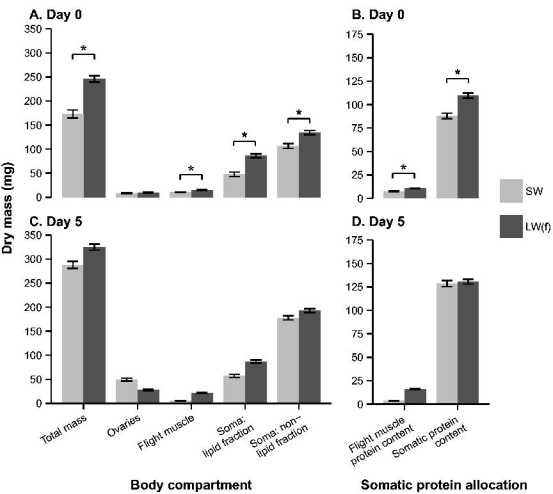

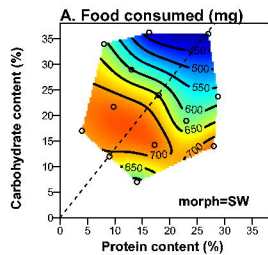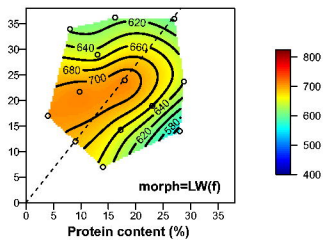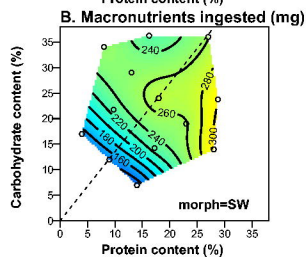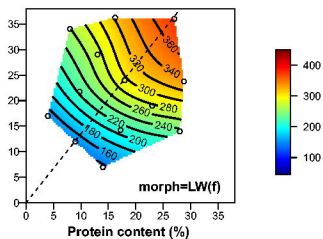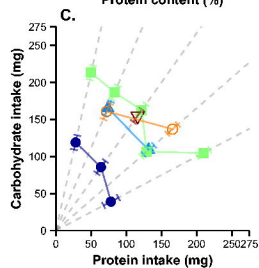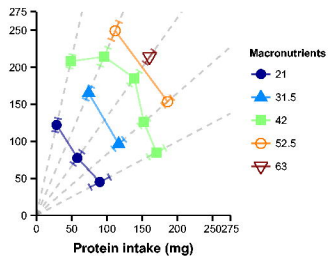

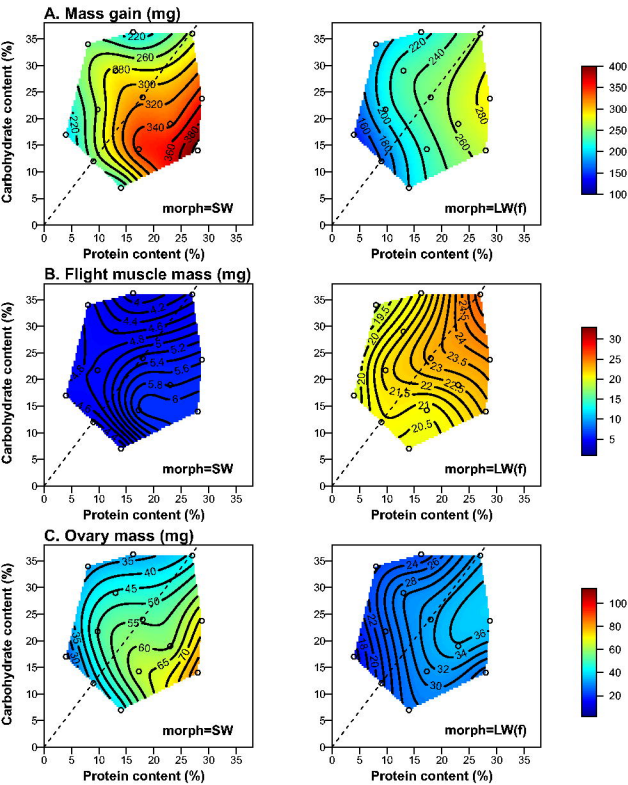



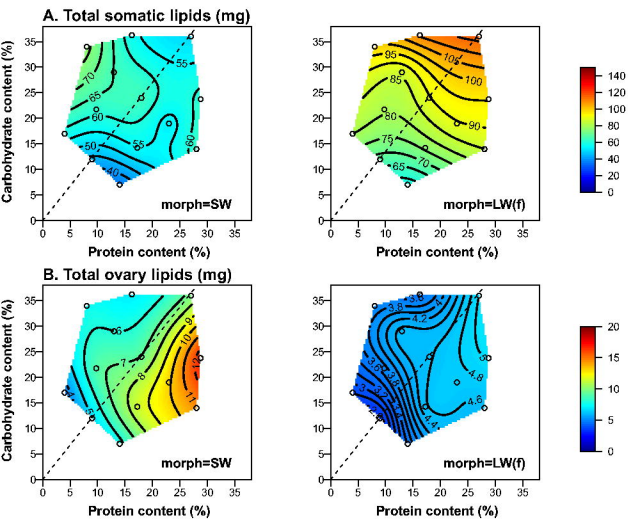

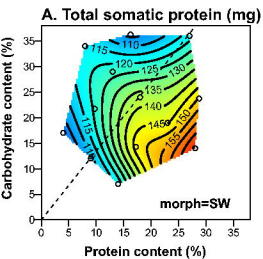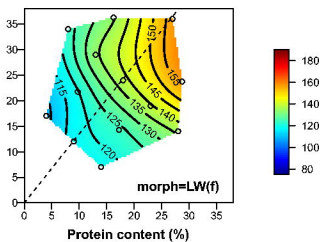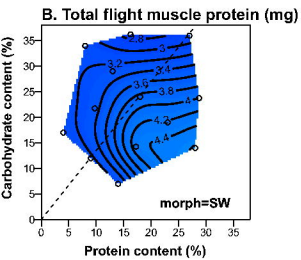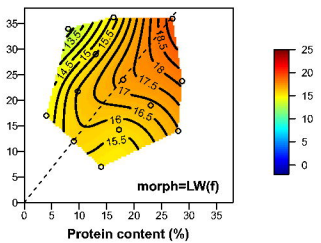

Source: https://cob.silverchair.com/jeb/article-pdf/doi/10.1242/jeb.112888/2033124/jeb_112888.pdf
